# Supplementary material
Source: publisher figshare collection journal article supplement (https://acs.figshare.com/ndownloader/files/4635355)
Supplement: Supplementary file 1 [file 4635355]

## Supporting Information

### Magnetic Ground State and Phase Diagram, $H_c(T)$ , for Magnetically Ordered $[\text{Ru}_2(\text{O}_2\text{CMe})_4]_3[\text{Cr}(\text{CN})_6]$

William W. Shum, Jason N. Schaller, and Joel S. Miller

The possibility that **1** may contain a higher-than-second order transition was investigated. The transition below the tricritical point ( $T < T_t$ ) is clearly a first order transition, due to the first derivative of energy (magnetization) being a discontinuous function. Between the tricritical point and critical temperature ( $T_t < T < T_c$ ), a different type of transition occurs in which the first derivative of energy (magnetization) is continuous, but second derivative (susceptibility,  $\chi$ ) is discontinuous (Figure S1). When third derivative ( $d\chi/dH$ ) is taken, no discontinuity is evident (Figure S2). Thus, the transition occurring between  $T_t$  and  $T_c$  is of the second order.

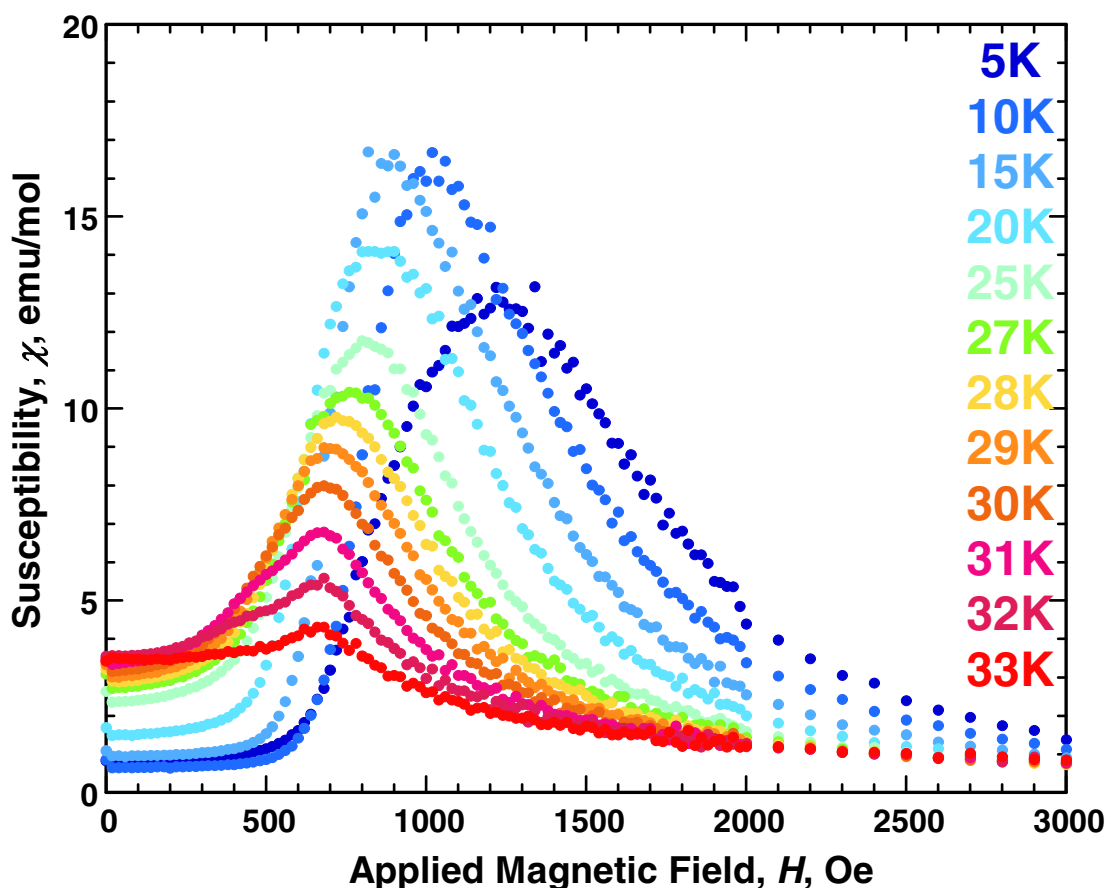

Figure S1.  $\chi(H, T)$  data for **1**.

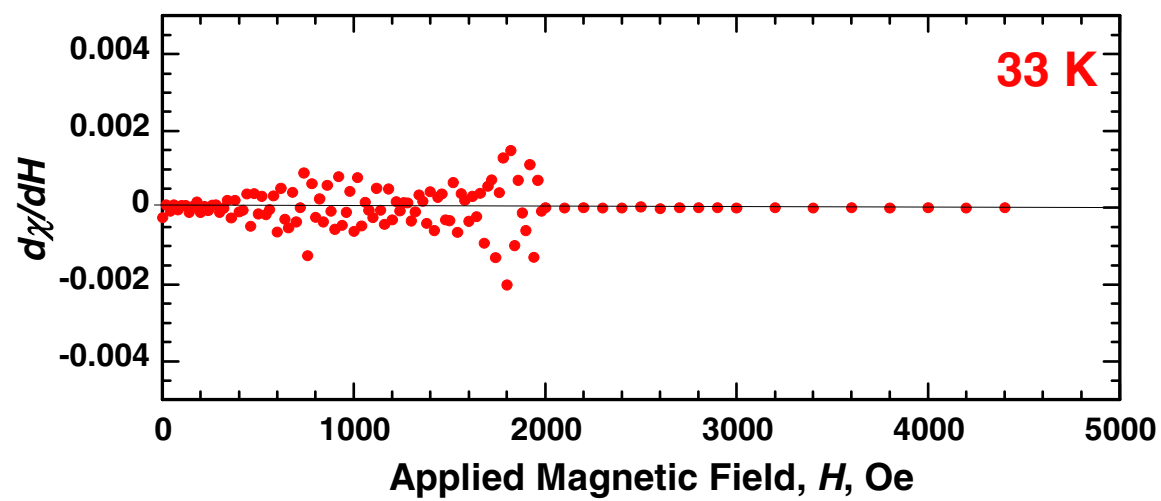

Figure S2. Representative 33-K  $d\chi/dH$  data for 1.
